# Supplementary material for: Comparison of voltages between atria: differences in sinus rhythm and atrial fibrillation
Source: Springer Nature journal article supplement (doi:10.1007/s10840-023-01671-0), 2023-10-24
Supplement: MOESM1 [file 26216772]

515 **Supplementary Materials**

517 **Supplementary Table 1: Comparison of Electrogram Voltages and Mapped Surface Area between**

518 **Sinus Rhythm vs Atrial Fibrillation**

| Paired Voltages (mV)    |     | Sinus Rhythm       | Atrial Fibrillation | P – Value    |
|-------------------------|-----|--------------------|---------------------|--------------|
| Left Atrium             |     | 0.61 [0.20 – 1.67] | 0.31 [0.10 – 0.74]  | All < 0.0005 |
| Right Atrium            |     | 0.68 [0.19 – 1.88] | 0.47 [0.14 – 1.07]  |              |
| Mapped Surface Area (%) |     |                    |                     |              |
|                         | LVM | 7.3 ± 6.9          | 12.2 ± 9.5          |              |
| Left Atrium             | IVM | 41.0 ± 12.1        | 50.5 ± 10.0         | < 0.0005     |
|                         | NVM | 51.7 ± 17.2        | 37.3 ± 16.1         |              |
|                         | LVM | 6.5 ± 5.3          | 8.4 ± 8.3           |              |
| Right Atrium            | IVM | 42.0 ± 10.1        | 44.6 ± 6.9          | 0.62         |
|                         | NVM | 51.5 ± 13.6        | 47.0 ± 13.8         |              |

520 Data is mean ± standard deviation or median [lower quartile – upper quartile]. IVM: Intermediate voltage myocardium;  
 521 LVM: Low voltage myocardium; mV: Millivolts; NVM: Normal voltage myocardium

525 **Supplementary Table 2: Comparison of Electrogram Voltages and Mapped Surface Area between**

526 **Paroxysmal and Persistent Atrial Fibrillation**

527

| Global Voltages (mV)    |         | Paroxysmal         | Persistent         | P – Value    |
|-------------------------|---------|--------------------|--------------------|--------------|
| <b>Left Atrium</b>      | Bipolar | 1.13 [0.39 – 2.93] | 0.52 [0.16 – 1.49] | All < 0.0005 |
| <b>Right Atrium</b>     | Bipolar | 0.93 [0.24 – 2.46] | 0.57 [0.17 – 1.69] |              |
| Mapped Surface Area (%) |         |                    |                    |              |
|                         | LVM     | 0.7 ± 0.7          | 6.6 ± 6.8          |              |
| <b>Left Atrium</b>      | IVM     | 32.0 ± 10.6        | 43.1 ± 11.4        | 0.01         |
|                         | NVM     | 67.3 ± 11.0        | 50.3 ± 16.4        |              |
|                         | LVM     | 1.6 ± 1.3          | 6.5 ± 5.3          |              |
| <b>Right Atrium</b>     | IVM     | 35.7 ± 10.1        | 42.0 ± 10.1        | 0.04         |
|                         | NVM     | 62.7 ± 12.1        | 51.5 ± 13.6        |              |

528

529

530

Data is mean ± standard deviation or median [lower quartile – upper quartile]. Maps were taken in sinus rhythm with proximal coronary sinus pacing. IVM: Intermediate voltage myocardium; LVM: Low voltage myocardium; mV: Millivolts; NVM: Normal voltage myocardium

531

532 **Supplementary Table 3: Comparisons of Electrogram Voltages between Atria using Generalised**

533 **Linear Mixed Modelling**

534

| Voltages (mV)     |            | Left Atrium        | Right Atrium       | LA/RA | 95% Confidence Interval | Random Factor P-Value |
|-------------------|------------|--------------------|--------------------|-------|-------------------------|-----------------------|
| <b>Paroxysmal</b> | SR Bipolar | 0.93 [0.34 – 2.40] | 0.93 [0.24 – 2.46] | 1.06  | 1.05 – 1.07             | 0.06                  |
|                   | SR Bipolar | 0.50 [0.15 – 1.40] | 0.57 [0.17 – 1.69] | 0.78  | 0.77 – 0.79             | 0.02                  |
| <b>Persistent</b> | AF Bipolar | 0.40 [0.14 – 0.90] | 0.47 [0.13 – 1.18] | 0.70  | 0.69 – 0.71             | 0.03                  |

535 Data is median [lower quartile – upper quartile]. Dependent variable = Electrogram amplitude, Fixed Factor = Left atrium  
 536 referenced to right atrium; Random factor = Patient. The model used a gamma distribution with logarithmic link function.  
 537 LA/RA is calculated from converting unstandardised  $\beta$  co-efficient

538 AF: Atrial Fibrillation; LA: Left Atrium; mV: Millivolts; RA: Right Atrium; SR: Sinus Rhythm.

539

540

541 **Supplementary Table 4: Comparison of Mapped Surface Area between Atria**

542

| Mapped Surface Area (%)       |     | Left Atrium | Right Atrium | P-Value |
|-------------------------------|-----|-------------|--------------|---------|
| <b>All<br/>(n = 17)</b>       | LVM | 4.0 ± 6.3   | 5.6 ± 4.6    | 0.26    |
|                               | IVM | 38.4 ± 14.0 | 37.6 ± 10.7  |         |
|                               | NVM | 57.5 ± 18.4 | 56.8 ± 13.8  |         |
| <b>Paroxysmal<br/>(n = 8)</b> | LVM | 0.7 ± 0.7   | 1.6 ± 1.3    | 0.08    |
|                               | IVM | 32.0 ± 10.6 | 35.7 ± 10.1  |         |
|                               | NVM | 67.3 ± 11.0 | 62.7 ± 12.1  |         |
| <b>Persistent<br/>(n = 9)</b> | LVM | 7.0 ± 7.6   | 6.5 ± 5.3    | 0.91    |
|                               | IVM | 44.1 ± 14.7 | 42.0 ± 10.1  |         |
|                               | NVM | 48.9 ± 19.9 | 51.5 ± 13.6  |         |

543 Data is mean ± standard deviation. Maps were taken in sinus rhythm with proximal coronary sinus pacing. IVM:  
 544 Intermediate voltage myocardium; LVM: Low voltage myocardium; mV: Millivolts; NVM: Normal voltage myocardium

545

546

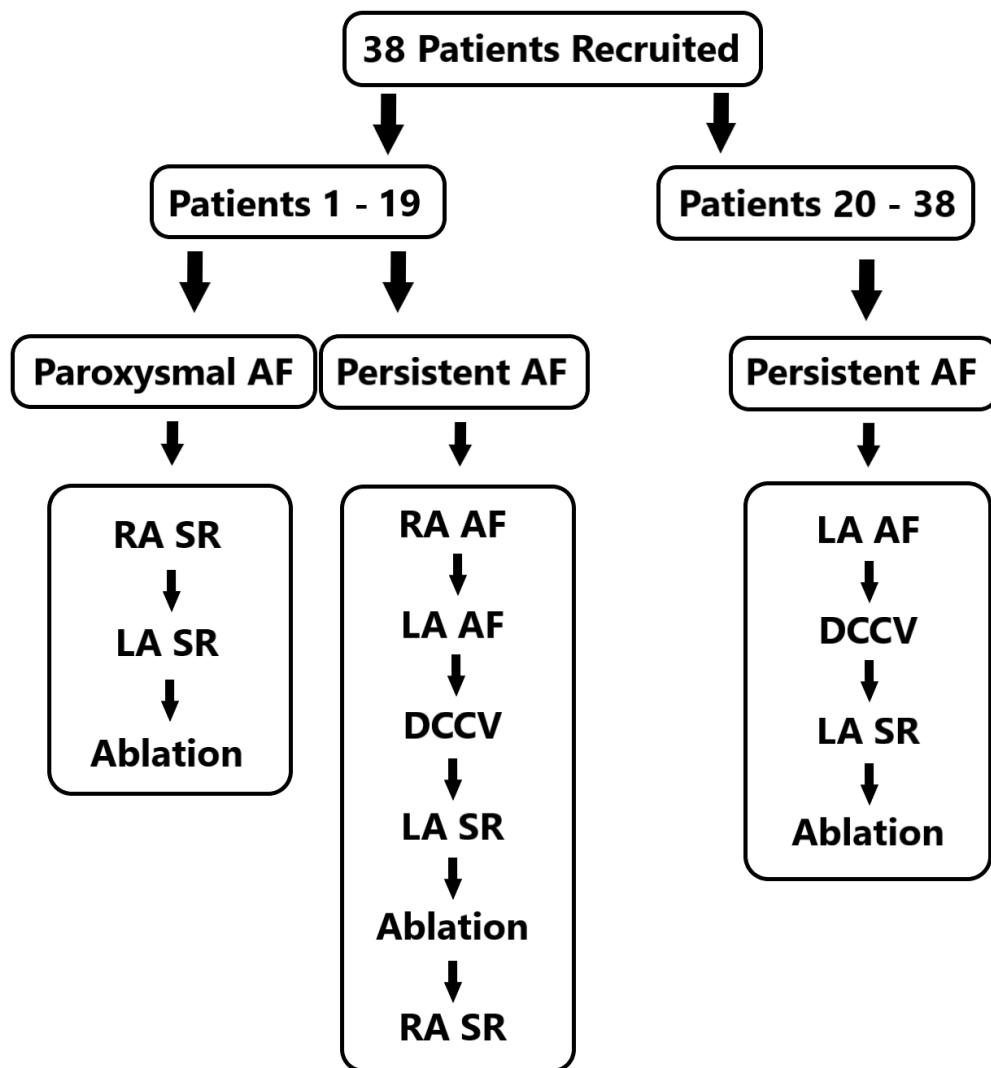

**Supplementary Materials Figure 1.**

Study mapping protocol. AF = Atrial fibrillation; DCCV = Direct current cardioversion; LA = Left atrium; SR = Sinus rhythm; RA = Right atrium.

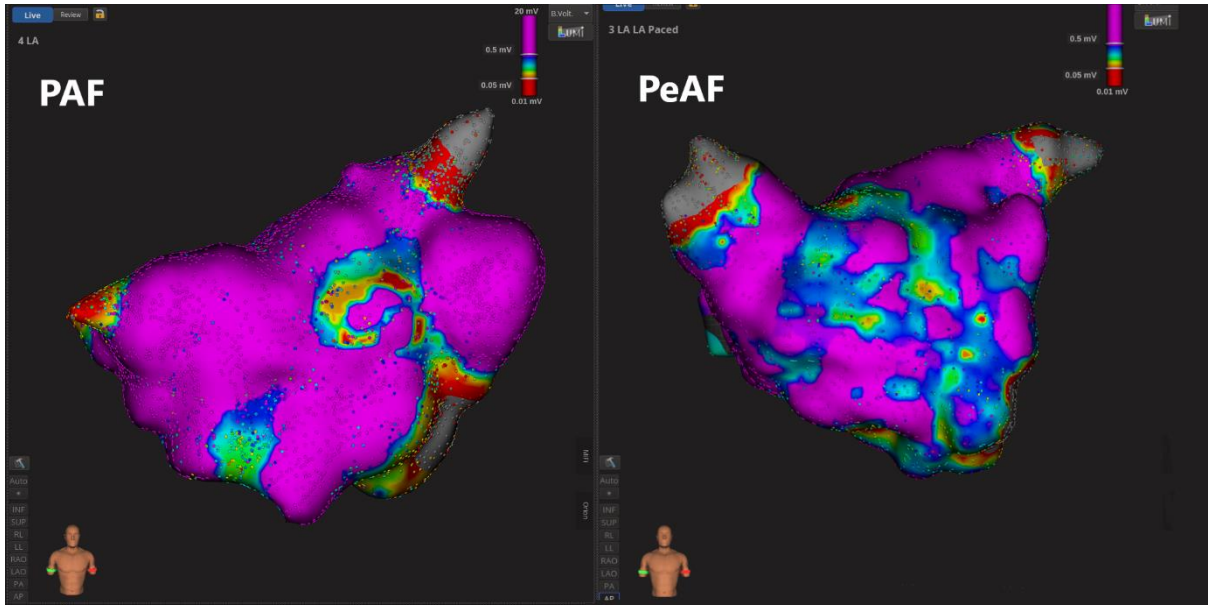

1  
2  
3  
4  
5  
6  
7  
8  
9  
10  
11  
12  
13  
14  
15  
16  
17  
18  
19 557  
20  
21 558  
22  
23 559  
24 560  
25  
26 561  
27  
28 562  
29  
30  
31  
32  
33  
34  
35  
36  
37  
38  
39  
40  
41  
42  
43  
44  
45  
46  
47  
48  
49  
50  
51  
52  
53  
54  
55  
56  
57  
58  
59  
60  
61  
62  
63  
64  
65

**Supplementary Materials Figure 2.**

An example of 3D electroanatomical maps of the left atrium in patients with paroxysmal (PAF) and persistent atrial fibrillation (PeAF)

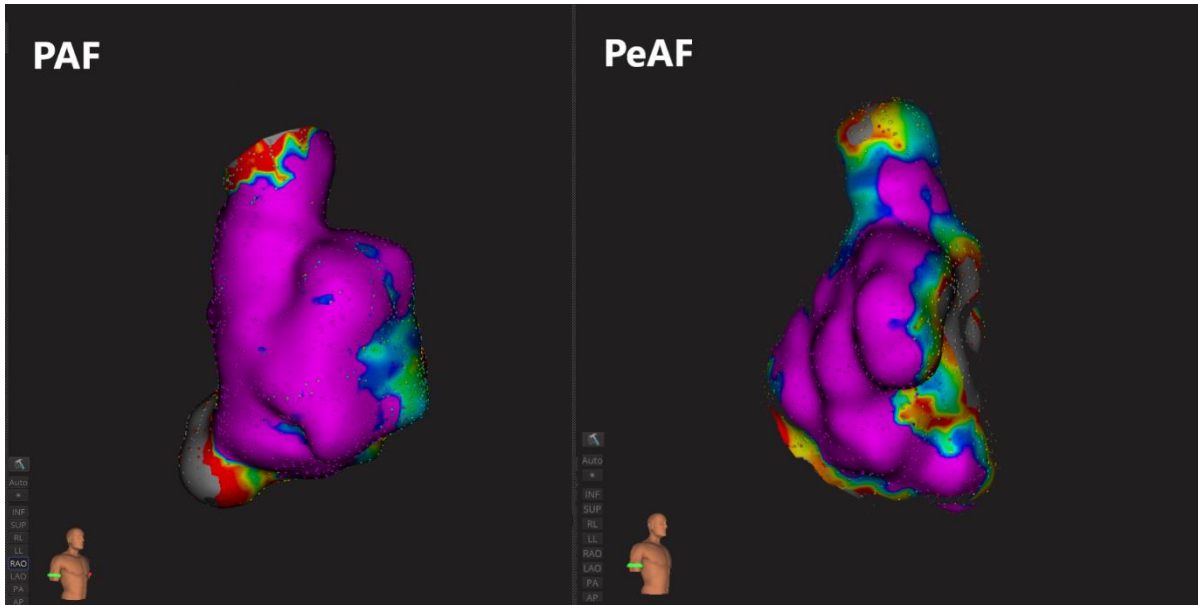

1  
2  
3  
4  
5  
6  
7  
8  
9  
10  
11  
12  
13  
14  
15  
16  
17  
18  
19  
20  
21  
22  
23  
24  
25  
26  
27  
28  
29  
30  
31  
32  
33  
34  
35  
36  
37  
38  
39  
40  
41  
42  
43  
44  
45  
46  
47  
48  
49  
50  
51  
52  
53  
54  
55  
56  
57  
58  
59  
60  
61  
62  
63  
64  
65

563  
564  
565  
566  
567  
568

**Supplementary Materials Figure 3.**

An example of 3D electroanatomical maps of the right atrium in patients with paroxysmal (PAF) and persistent atrial fibrillation (PeAF)
